# Supplementary material for: Atomic layer deposition of dielectric Y2O3 thin films from a homoleptic yttrium formamidinate precursor and water
Source: Royal Society of Chemistry journal article supplement (doi:10.1039/d0ra09876k), 2021-01-01
Supplement: d0ra09876k1.pdf [file d0ra09876k1.pdf]

## **Electronic Supplementary Information**

### **Atomic layer deposition of dielectric $Y_2O_3$ thin films from a homoleptic yttrium formamidinate precursor and water**

Nils Boysen<sup>a</sup>, David Zanders<sup>a</sup>, Thomas Berning<sup>b</sup>, Sebastian M. J. Beer<sup>a</sup>, Detlef Rogalla<sup>c</sup>, Claudia Bock<sup>b</sup>, Anjana Devi<sup>a\*</sup>

<sup>a</sup>Inorganic Materials Chemistry, Ruhr University Bochum, 44801 Bochum, Germany (anjana.devi@rub.de)

<sup>b</sup>Microsystems Technology, Ruhr University Bochum, 44801 Bochum, Germany

<sup>c</sup>RUBION, Ruhr University Bochum, 44801 Bochum, Germany

## S1. EI-MS Spectra

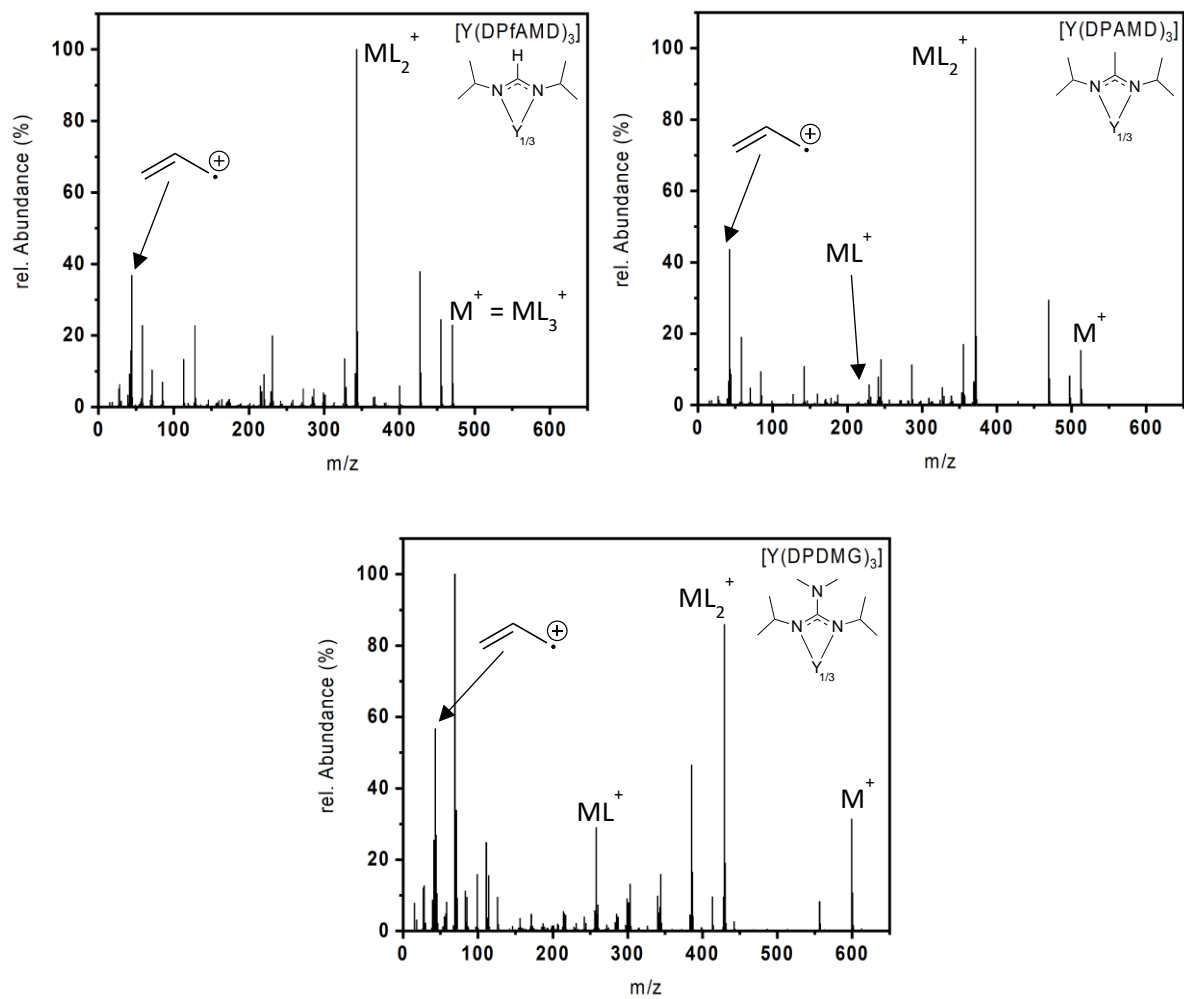

Figure S 1. EI-MS spectra with the fragmentation behavior for all three precursor molecules. The molecular peak ( $M^+$ ) is the peak with the highest observable  $m/z$  ratio in all spectra.<sup>[1-4]</sup>

### S3. ALD Saturation Studies

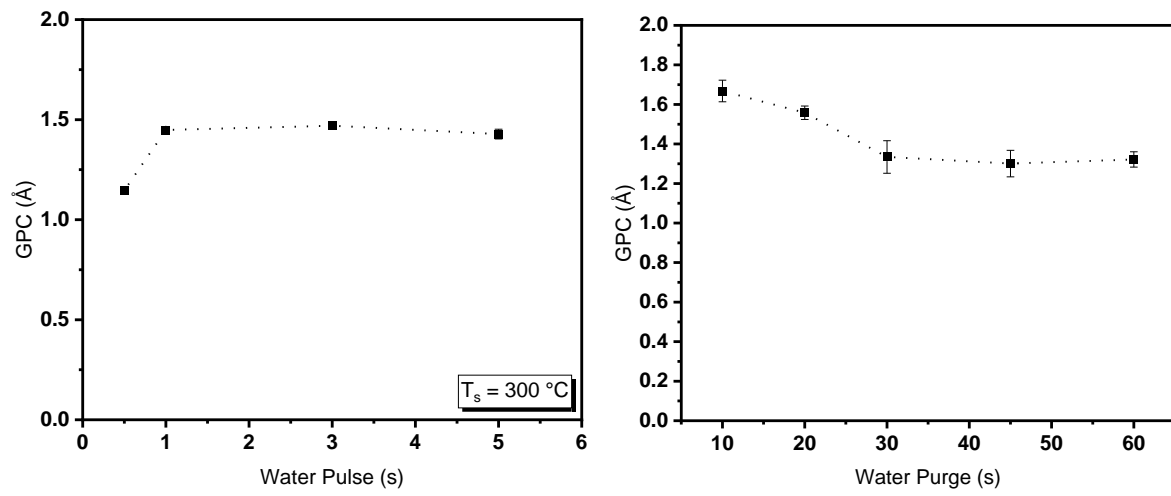

Figure S 2. Water saturation curves: Dependence of the GPC to water pulse length (left) and water purge length (right) for films deposited at 300 °C on Si(100).

## S4. Composition analysis through RBS/NRA

Table S1. Overview of the atomic percentage values for the light elements (C, N and O) obtained by NRA and for yttrium obtained by RBS at different substrate temperatures  $T_s$  resulting in different oxygen to yttrium ratios.

| $T_s$ (°C)         | C (at.%) | N (at.%) | O (at.%) | Y (at.%) | O/Y |
|--------------------|----------|----------|----------|----------|-----|
| 100                | 19       | 1        | 71       | 9        | 7.7 |
| 125                | 6        | 0        | 69       | 24       | 2.8 |
| 150                | 5        | 1        | 66       | 28       | 2.3 |
| 175                | 4        | 0        | 67       | 28       | 2.4 |
| 200                | 2        | 0        | 65       | 33       | 2.0 |
| 225                | 1        | 2        | 64       | 33       | 2.0 |
| 250                | 1        | 0        | 65       | 33       | 2.0 |
| 275                | < 1      | 1        | 64       | 35       | 1.8 |
| 300                | < 1      | < 1      | 63       | 37       | 1.7 |
| 300 <sup>(a)</sup> | < 1      | < 1      | 59       | 40       | 1.5 |
| 325                | < 1      | 2        | 61       | 37       | 1.6 |

. <sup>(a)</sup> Y<sub>2</sub>O<sub>3</sub> film thickness d = 470 nm using the same conditions as mentioned before.

## S5. X-ray Photoelectron Spectroscopy (XPS)

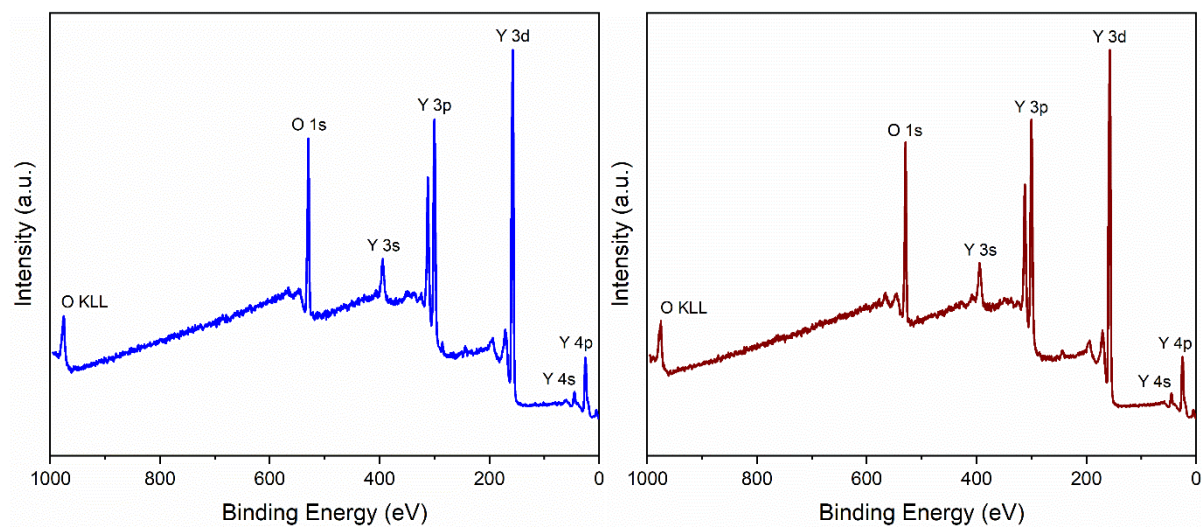

Figure S 3. XPS survey spectra for the as-introduced 40 nm  $Y_2O_3$  thin film on Si(100) deposited at 300 °C (left chart in blue) and for the 1 min  $Ar^+$  sputtered surface (right chart in red).

## S6. J-E Characteristics of the MIS Capacitors

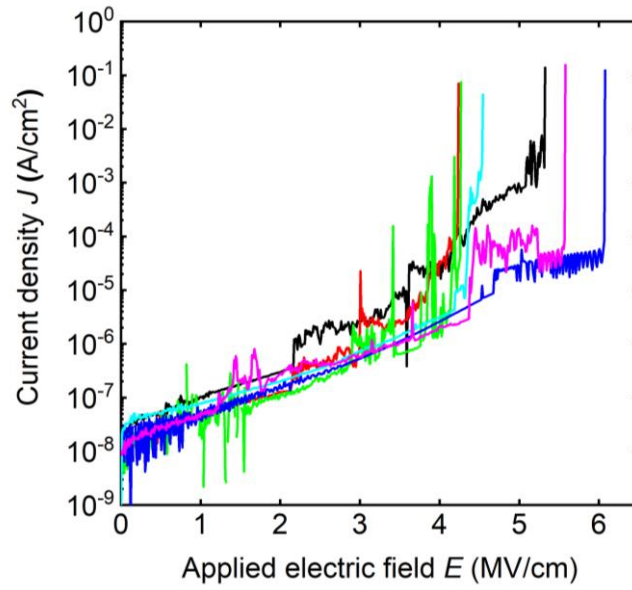

Figure S 4. Leakage current density  $J$  as a function of the electric field  $E$  for several MIS devices incorporating  $Y_2O_3$  ( $d = 24$  nm) deposited at  $T = 300$  °C. Each color represents a  $J$ - $E$  characteristic of an individual device with identical device geometries.

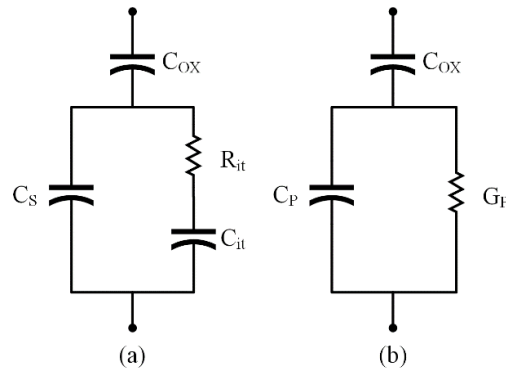

Figure S 5. Equivalent circuit of an MIS capacitor including interface-trap effect (reproduced from Nicollian and Goetzberger).<sup>[5]</sup>

Equations (1-3):

$$C_p = C_s + \frac{C_{it}}{1+(\omega\tau_{it})^2} \quad (1)$$

$$\frac{G_p}{\omega} = \frac{q\omega\tau_{it}D_{it}}{1+(\omega\tau_{it})^2} \quad (2)$$

$$D_{it} = \frac{2G_{p,max}}{q\omega_{max}} \quad (3)$$

## S7. References

- [1] P. de Rouffignac, J.-S. Park, R. G. Gordon, *Chem. Mater.* **2005**, *17*, 4808–4814.
- [2] A. P. Milanov, R. A. Fischer, A. Devi, *Inorg. Chem.* **2008**, *47*, 11405–11416.
- [3] A. P. Milanov, K. Xu, S. Cwik, H. Parala, T. de los Arcos, H.-W. Becker, D. Rogalla, R. Cross, S. Paul, A. Devi, *Dalton Trans.* **2012**, *41*, 13936.
- [4] S. Karle, V.-S. Dang, M. Prenzel, D. Rogalla, H.-W. Becker, A. Devi, *Chem. Vap. Depos.* **2015**, *21*, 335–342.
- [5] E. H. Nicollian, A. Goetzberger, *Appl. Phys. Lett.* **1965**, *7*, 216–219.
